# Supplementary material for: Exploring the Experiences of Family Members When a Patient Is Admitted to the ICU with a Severe Traumatic Brain Injury: A Scoping Review
Source: MDPI journal article supplement (doi:10.3390/jcm12134197), 2023-06-21
Supplement: s1 [file s1]

## Supplementary material 2

### Search Strategies

#### OID MEDLINE

Ovid MEDLINE(R) ALL <1946 to February 01, 2023>

| Row | Search terms                                                                                                                                                                                           | Number of references |
|-----|--------------------------------------------------------------------------------------------------------------------------------------------------------------------------------------------------------|----------------------|
| 1   | (ICU or "intensive care" or "critical care" or "critical* ill*" or ITU).mp.                                                                                                                            | 317951               |
| 2   | exp Critical Care/ or exp Intensive Care Units/                                                                                                                                                        | 153670               |
| 3   | exp Brain Injuries, Traumatic/                                                                                                                                                                         | 23005                |
| 4   | ("traumatic brain injury" or "traumatic brain injuries").mp.                                                                                                                                           | 47096                |
| 5   | ((head or crani* or cerebr* or capitis or brain* or forebrain* or skull* or hemispher* or "intra-cran*" or "inter-cran*") adj3 (injur* or trauma* or damag* or wound* or fracture* or contusion*)).mp. | 217068               |
| 6   | ((head or crani* or cerebr* or brain* or "intra-cran*" or "inter-cran*") adj3 (haematoma* or hematoma* or haemorrhag* or hemorrhag* or bleed* or pressure)).mp.                                        | 106754               |
| 7   | (Glasgow adj3 (coma or outcome) adj3 (scale* or score*)).mp.                                                                                                                                           | 23090                |
| 8   | "rancho los amigos scale".mp.                                                                                                                                                                          | 45                   |
| 9   | ("diffuse axonal injury" or "diffuse axonal injuries").mp.                                                                                                                                             | 1793                 |
| 10  | ((brain or cerebral or intracranial) adj3 (oedema or edema or swell*)).mp.                                                                                                                             | 26288                |
| 11  | ((unconscious* or coma* or concuss* or "persistent vegetative state") adj3 (injur* or trauma* or damag* or wound* or fracture*)).mp.                                                                   | 5299                 |
| 12  | exp Family/                                                                                                                                                                                            | 362325               |
| 13  | exp Caregivers/ or exp Caregiver Burden/                                                                                                                                                               | 48647                |
| 14  | (mother* or father* or mum* or dad* or parent or parents).mp.                                                                                                                                          | 887809               |
| 15  | (family or families).mp.                                                                                                                                                                               | 1312407              |
| 16  | (grandparent* or grandmother* or grandfather* or grandma* or grandpa* or sibling* or brother* or sister* or husband* or wife* or wives* or spous* or aunt or aunts or uncle or uncles or cousin*).mp.  | 198485               |
| 17  | exp Parents/                                                                                                                                                                                           | 138177               |
| 18  | Grandparents/ or Siblings/                                                                                                                                                                             | 13786                |
| 19  | 1 or 2                                                                                                                                                                                                 | 324707               |
| 20  | or/3-11                                                                                                                                                                                                | 330374               |
| 21  | or/12-18                                                                                                                                                                                               | 2219170              |
| 22  | 19 and 20 and 21                                                                                                                                                                                       | 913                  |
| 23  | exp Animals/ not Humans/                                                                                                                                                                               | 5088468              |

|    |                                                                                                                                                                               |         |
|----|-------------------------------------------------------------------------------------------------------------------------------------------------------------------------------|---------|
| 24 | 22 not 23                                                                                                                                                                     | 912     |
| 25 | (exp Child/ or exp Infant/ or child*.mp. or infant*.mp. or baby.mp. or babies.mp. or NICU.mp. or neonat*.mp. or paediatric*.mp. or pediatric*.mp. or PICU.mp.) not exp Adult/ | 2490047 |
| 26 | 24 not 25                                                                                                                                                                     | 554     |
| 27 | limit 26 to english language                                                                                                                                                  | 495     |
