# Supplementary material for: Exploring the Experiences of Family Members When a Patient Is Admitted to the ICU with a Severe Traumatic Brain Injury: A Scoping Review
Source: MDPI journal article supplement (doi:10.3390/jcm12134197), 2023-06-21
Supplement: s1 [file s1]

#### Supplementary material 4 - Critical appraisal of selected studies

| Qualitative research *       | Section A - Are the results of the study valid?             |                                              |                                                                             |                                                                          |                                                                       |                                                                                         |  | Section B - Is it worth continuing?                   |                                                 |                                            | Section C - Will the results help locally?                                                                                                    |  |  | Appraisal |
|------------------------------|-------------------------------------------------------------|----------------------------------------------|-----------------------------------------------------------------------------|--------------------------------------------------------------------------|-----------------------------------------------------------------------|-----------------------------------------------------------------------------------------|--|-------------------------------------------------------|-------------------------------------------------|--------------------------------------------|-----------------------------------------------------------------------------------------------------------------------------------------------|--|--|-----------|
| Citation details             | 1. Was there a clear statement of the aims of the research? | 2. Is a qualitative methodology appropriate? | 3. Was the research design appropriate to address the aims of the research? | 4. Was the recruitment strategy appropriate to the aims of the research? | 5. Was the data collected in a way that addressed the research issue? | 6. Has the relationship between researcher and participants been adequately considered? |  | 7. Have ethical issues been taken into consideration? | 8. Was the data analysis sufficiently rigorous? | 9. Is there a clear statement of findings? | 10. How valuable is the research?                                                                                                             |  |  |           |
| 10. Keenan and Joseph (2010) | Yes                                                         | Yes                                          | Yes                                                                         | Can't tell                                                               | Yes                                                                   | No                                                                                      |  | No                                                    | Yes                                             | Yes                                        | Contribution related to other evidence and limitations identified. Questionable value to future research, not evident. Difficult readability. |  |  | Medium    |
| 20. Bond et al (2003)        | Yes                                                         | Yes                                          | Yes                                                                         | Yes                                                                      | Yes                                                                   | Yes                                                                                     |  | Yes                                                   | Yes                                             | Yes                                        | Contribution related to other evidence, new areas of research and limitations identified. Valuable relevance to practice.                     |  |  | High      |
| 22. Lefebvre et al (2005)    | Yes                                                         | Yes                                          | Yes                                                                         | Yes                                                                      | Yes                                                                   | No                                                                                      |  | No                                                    | Yes                                             | No                                         | Contribution related to other evidence, new areas of research and limitations identified. Difficult readability; findings extracted by KH.    |  |  | Low       |
| 23. Lefebvre & Levert (2006) | No                                                          | Can't tell                                   | Can't tell                                                                  | Can't tell                                                               | Can't tell                                                            | No                                                                                      |  | No                                                    | Yes                                             | No                                         | Contribution related to other evidence, new areas of research not identified, limitations identified. Difficult readability;                  |  |  | Low       |

|                         |                                                        |                                                   |                                                           |                                                          |                                                                      |                                                           |                                           |                                           |                                            |                                 |                                |                                                                                                                                                            |                                           |                                       |        |
|-------------------------|--------------------------------------------------------|---------------------------------------------------|-----------------------------------------------------------|----------------------------------------------------------|----------------------------------------------------------------------|-----------------------------------------------------------|-------------------------------------------|-------------------------------------------|--------------------------------------------|---------------------------------|--------------------------------|------------------------------------------------------------------------------------------------------------------------------------------------------------|-------------------------------------------|---------------------------------------|--------|
|                         |                                                        |                                                   |                                                           |                                                          |                                                                      |                                                           |                                           |                                           |                                            |                                 |                                | findings extracted by KH.                                                                                                                                  |                                           |                                       |        |
| 24. Piyakong (2014)     | Yes                                                    | Yes                                               | Yes                                                       | Can't tell                                               | Can't tell                                                           | No                                                        |                                           |                                           | No                                         | No                              | Yes                            | Contribution not related to other evidence, limitations not identified. Questionable value to future research, not evident. Pilot study.                   |                                           |                                       | Low    |
| 25. Kean (2010)         | Yes                                                    | Yes                                               | Yes                                                       | Yes                                                      | Yes                                                                  | Can't tell                                                |                                           |                                           | Yes                                        | Yes                             | Yes                            | Contribution related to other evidence, new areas of research and limitations identified. Valuable novel insight, relevant to practice.                    |                                           |                                       | High   |
| 26. Quinn et al (2017)  | Yes                                                    | Yes                                               | Yes                                                       | Yes                                                      | Yes                                                                  | Yes                                                       |                                           |                                           | Yes                                        | Yes                             | Yes                            | Contribution related to other evidence, new areas of research and limitations identified. Valuable for development of decision aid. Difficult readability. |                                           |                                       | Medium |
| 27. Jones et al (2021)  | Yes                                                    | Yes                                               | Yes                                                       | Yes                                                      | Yes                                                                  | Can't tell                                                |                                           |                                           | Yes                                        | Yes                             | Yes                            | Contribution related to other evidence, new areas of research and limitations identified. Valuable for development of decision aid. Difficult readability. |                                           |                                       | Medium |
| <b>Cohort study**</b>   | <b>Section A - Are the results of the study valid?</b> |                                                   |                                                           |                                                          |                                                                      |                                                           |                                           |                                           | <b>Section B - Is it worth continuing?</b> |                                 |                                | <b>Section C - Will the results help locally?</b>                                                                                                          |                                           |                                       |        |
| <b>Citation details</b> | 1. Did the study address a clearly focused issue?      | 2. Was the cohort recruited in an acceptable way? | 3. Was the exposure accurately measured to minimise bias? | 4. Was the outcome accurately measured to minimise bias? | 5. (a) Have the authors identified all important confounding factors | 5. (b) Have they taken account of the confounding factors | 6. (a) Was the follow up of subjects long | 6. (b) Was the follow up of subjects long | 7. What are the results of the study?      | 8. How precise are the results? | 9. Do you believe the results? | 10. Can the results be applied to the local population?                                                                                                    | 11. Do the results of this study fit with | 12. What are the implications of this |        |

|                                                                                                  |     |     |     |     | inding factors? | in the design and/ or analysis ? | complete enough? | enough?    |                                                              |                                 |     |    | other available evidence ? | study for practice? |        |
|--------------------------------------------------------------------------------------------------|-----|-----|-----|-----|-----------------|----------------------------------|------------------|------------|--------------------------------------------------------------|---------------------------------|-----|----|----------------------------|---------------------|--------|
| 21. Kanmani et al (2019)                                                                         | Yes | Yes | Yes | Yes | Yes             | Yes                              | No               | Can't tell | Carers of TBI patients reported financial burden and anxiety | Fair (mean and StDev presented) | Yes | No | Yes                        | Can't tell          | Medium |
| *Critical Appraisal Skills Programme (2021). CASP Qualitative Checklist. [accessed 24/04/2023]   |     |     |     |     |                 |                                  |                  |            |                                                              |                                 |     |    |                            |                     |        |
| **Critical Appraisal Skills Programme (2021). CASP Cohort study Checklist. [accessed 24/04/2023] |     |     |     |     |                 |                                  |                  |            |                                                              |                                 |     |    |                            |                     |        |
