# Supplementary material for: Exploring the Experiences of Family Members When a Patient Is Admitted to the ICU with a Severe Traumatic Brain Injury: A Scoping Review
Source: MDPI journal article supplement (doi:10.3390/jcm12134197), 2023-06-21
Supplement: s1 [file s1]

### Supplementary material 3 – Reasons for exclusion

| Reference                                                                                                                                                                                                                                                                                                                                                                                                                            | Reason for exclusion                     |
|--------------------------------------------------------------------------------------------------------------------------------------------------------------------------------------------------------------------------------------------------------------------------------------------------------------------------------------------------------------------------------------------------------------------------------------|------------------------------------------|
| Aboubakr M, Yousaf MIK, Alameda G. Brain Death Criteria. 2021 Dec 27. In: StatPearls [Internet]. Treasure Island (FL): StatPearls Publishing; 2022 Jan–. PMID: 31424728.                                                                                                                                                                                                                                                             | No family experience                     |
| Bader, M.K. (2004). Changing Team Practice: Applying Evidence-Based Brain Injury Guidelines to Clinical Practice. <i>Worldviews on Evidence-Based Nursing</i> . 1(4), pp. 277                                                                                                                                                                                                                                                        | Conference abstract                      |
| Bogoch II, Sockalingam S, Bollegala N, Baker A, Bhalerao S. Family types in the neurotrauma intensive care unit. <i>Am J Crit Care</i> . 2005 Jul;14(4):283-4. PMID: 15980418.                                                                                                                                                                                                                                                       | Opinion article                          |
| Creutzfeldt CJ, Schutz REC, Zahuranec DB, Lutz BJ, Curtis JR, Engelberg RA. Family Presence for Patients with Severe Acute Brain Injury and the Influence of the COVID-19 Pandemic. <i>J Palliat Med</i> . 2021 May;24(5):743-746. doi: 10.1089/jpm.2020.0520. Epub 2020 Nov 17. PMID: 33210984; PMCID: PMC8064964.                                                                                                                  | Not severe TBI                           |
| Choustikova J, Turunen H, Tuominen SH, Coco K. Traumatic brain injury patients' family members' evaluations of the social support provided by healthcare professionals in acute care hospitals. <i>Journal of Clinical Nursing</i> . 2020;29(17/18):3325-3335. doi:10.1111/jocn.15359                                                                                                                                                | Unable to determine TBI severity         |
| Engli M, Kirsivali-Farmer K.Engli M, et al. Needs of family members of critically ill patients with and without acute brain injury. <i>J Neurosci Nurs</i> . 1993 Apr;25(2):78-85. doi: 10.1097/01376517-199304000-00003. <i>J Neurosci Nurs</i> . 1993. PMID: 8478558                                                                                                                                                               | Unable to determine TBI severity         |
| Hoewing, B. (2017). Assessing the Quality of Education and Information Delivery to Family Members of Patients with Moderate to Severe Traumatic Brain Injury. <a href="https://repository.arizona.edu/handle/10150/624571">https://repository.arizona.edu/handle/10150/624571</a>                                                                                                                                                    | Quality improvement project              |
| Hwang DY. Caring for Patients' Families (or Lack of Family) in Neurocritical Care. <i>Neurocrit Care</i> . 2017 Oct;27(2):151-153. doi: 10.1007/s12028-017-0470-z. PMID: 28916970.                                                                                                                                                                                                                                                   | Editorial                                |
| Hwang, D. Y., Knies, A. K., Mampre, D., Kolenikov, S., Schalk, M., Hammer, H., White, D. B., Holloway, R. G., Sheth, K. N., & Fraenkel, L. (2020). Concerns of surrogate decision makers for patients with acute brain injury: A US population survey. <i>Neurology</i> , 94(19), e2054-e2068. <a href="https://doi.org/10.1212/WNL.0000000000009406">https://doi.org/10.1212/WNL.0000000000009406</a>                               | No family experience                     |
| Johnson BP. One family's experience with head injury: a phenomenological study. <i>J Neurosci Nurs</i> . 1995 Apr;27(2):113-8. doi: 10.1097/01376517-199504000-00010. PMID: 7622948.                                                                                                                                                                                                                                                 | Under 18                                 |
| Kreitzer, N., Bakas, T., Kurowski, B., Lindsell, C. J., Ferioli, S., Foreman, B., Ngwenya, L. B., Thomas, S., Keegan, S., Adeoye, O. (2020). The experience of caregivers following a moderate to severe traumatic brain injury requiring icu admission. <i>Journal of Head Trauma Rehabilitation</i> , 35, E299-E309. <a href="https://dx.doi.org/10.1097/HTR.0000000000000525">https://dx.doi.org/10.1097/HTR.0000000000000525</a> | Unable to separate severe TBI in results |
| Lester EG, Mace RA, Bannan SM, Popok PJ, Gates MV, Meyers E, Tehan T, Sagueiro D, Rosand J, Macklin EA, Vranceanu AM. Can a Dyadic Resiliency Program Improve Quality of Life in Cognitively Intact Dyads of Neuro-ICU Survivors and Informal Caregivers? Results from a Pilot                                                                                                                                                       | No family experience                     |

|                                                                                                                                                                                                                                                                                                                                                                                                         |                                          |
|---------------------------------------------------------------------------------------------------------------------------------------------------------------------------------------------------------------------------------------------------------------------------------------------------------------------------------------------------------------------------------------------------------|------------------------------------------|
| RCT. Neurocrit Care. 2021 Dec;35(3):756-766. doi: 10.1007/s12028-021-01222-3. Epub 2021 Apr 21. PMID: 33880701.                                                                                                                                                                                                                                                                                         |                                          |
| Lin A, Vranceanu AM, Guanci M, Salgueiro D, Rosand J, Zale EL. Gender Differences in Longitudinal Associations Between Intimate Care, Resiliency, and Depression Among Informal Caregivers of Patients Surviving the Neuroscience Intensive Care Unit. Neurocrit Care. 2020;32(2):512-521. doi:10.1007/s12028-019-00772-x, 10.1007/s12028-019-00772-x                                                   | Unable to separate severe TBI in results |
| Lou W, Granstein JH, Wabl R, Singh A, Wahlster S, Creutzfeldt CJ. Taking a Chance to Recover: Families Look Back on the Decision to Pursue Tracheostomy After Severe Acute Brain Injury. Neurocrit Care. 2022 Apr;36(2):504-510. doi: 10.1007/s12028-021-01335-9. Epub 2021 Sep 2. PMID: 34476722; PMCID: PMC8412876.                                                                                   | Unable to separate severe TBI in results |
| Marks JP, Daggett LM. A critical pathway for meeting the needs of families of patients with severe traumatic brain injury. J Neurosci Nurs. 2006 Apr;38(2):84-9. doi: 10.1097/01376517-200604000-00003. PMID: 16681288.                                                                                                                                                                                 | Quality improvement project              |
| Meurer K., Kubota R., Baskaran N., et al Stressors Experienced by Primary Caregivers of Severe Acute Brain Injury Patients Recovering from Coma in Neurointensive Care Units: Preliminary Findings from a Multicenter Qualitative Study. Neurology 2022;98(18 SUPPL):no pagination.                                                                                                                     | Conference abstract                      |
| Meyers E, Lin A, Lester E, Shaffer K, Rosand J, Vranceanu AM. Baseline resilience and depression symptoms predict trajectory of depression in dyads of patients and their informal caregivers following discharge from the Neuro-ICU. Gen Hosp Psychiatry. 2020 Jan-Feb;62:87-92. doi: 10.1016/j.genhosppsych.2019.12.003.                                                                              | Unable to separate severe TBI in results |
| Meyers EE, Shaffer KM, Gates M, Lin A, Rosand J, Vranceanu AM. Baseline Resilience and Posttraumatic Symptoms in Dyads of Neurocritical Patients and Their Informal Caregivers: A Prospective Dyadic Analysis. Psychosomatics. 2020 Mar-Apr;61(2):135-144. doi: 10.1016/j.psych.2019.11.007.                                                                                                            | Unable to determine TBI severity         |
| Mohamed WRA, Leach MJ, Reda NA, Abd-Ellatif MM, Mohammed MA, Abd-Elaziz MA. The effectiveness of clinical pathway-directed care on hospitalisation-related outcomes in patients with severe traumatic brain injury: A quasi-experimental study. J Clin Nurs. 2018 Mar;27(5-6):e820-e832. doi: 10.1111/jocn.14194. Epub 2018 Jan 23. PMID: 29193516.                                                     | No family experience                     |
| Muehlschlegel S, Hwang DY, Flahive J, Quinn T, Lee C, Moskowitz J, Goostrey K, Jones K, Pach JJ, Knies AK, Shutter L, Goldberg R, Mazor KM. Goals-of-care decision aid for critically ill patients with TBI: Development and feasibility testing. Neurology. 2020 Jul 14;95(2):e179-e193. doi: 10.1212/WNL.0000000000009770. Epub 2020 Jun 17. PMID: 32554766; PMCID: PMC7455326.                       | No family experience                     |
| Norup, A., Snipes, D. J., Siert, L., Mortensen, E. L., Perrin, P. B., & Arango-Lasprilla, J. C. (2013). Longitudinal Trajectories of Health Related Quality of Life in Danish Family Members of Individuals with Severe Brain Injury. <i>The Australian Journal of Rehabilitation Counselling</i> , 19(2), 71-83. <a href="https://doi.org/10.1017/jrc.2013.12">https://doi.org/10.1017/jrc.2013.12</a> | No family experience                     |
| O'Callahan, Julianne G. RN MD; Fink, Carol RN; Pitts, Lawrence H. MD; Luce, John M. MD FCCM [Miscellaneous] <i>Critical Care Medicine</i> . 23(9):1567-1575, September 1995.                                                                                                                                                                                                                            | No family experience                     |

|                                                                                                                                                                                                                                                                                                                                                                                      |                                          |
|--------------------------------------------------------------------------------------------------------------------------------------------------------------------------------------------------------------------------------------------------------------------------------------------------------------------------------------------------------------------------------------|------------------------------------------|
| Oyesanya TO, Harris Walker G, Loflin C, Prvu Bettger J. Negotiating the transition from acute hospital care to home: perspectives of patients with traumatic brain injury, caregivers and healthcare providers. <i>Journal of Integrated Care</i> . 2021;29(4):414-424. doi:10.1108/JICA-04-2021-0023                                                                                | Not ICU                                  |
| Schutz RE, Coats HL, Engelberg RA, Curtis JR, Creutzfeldt CJ. Is There Hope? Is She There? How Families and Clinicians Experience Severe Acute Brain Injury. <i>J Palliat Med</i> . 2017 Feb;20(2):170-176. doi: 10.1089/jpm.2016.0286. Epub 2016 Oct 20. PMID: 27763820                                                                                                             | Unable to separate severe TBI in results |
| Suppes A, Fins JJ. Surrogate expectations in severe brain injury. <i>Brain Inj</i> . 2013;27(10):1141-7. doi: 10.3109/02699052.2013.804201. Epub 2013 Jul 29. PMID: 23895513; PMCID: PMC5454804.                                                                                                                                                                                     | No family experience                     |
| Tate RL, Lane-Brown AT, Myles BM, Cameron ID. A longitudinal study of support needs after severe traumatic brain injury. <i>Brain Inj</i> . 2020 Jul 2;34(8):991-1000. doi: 10.1080/02699052.2020.1764101. Epub 2020 Jun 24. PMID: 32579407.                                                                                                                                         | Not ICU                                  |
| Trevick SA, Lord AS. Post-traumatic Stress Disorder and Complicated Grief are Common in Caregivers of Neuro-ICU Patients. <i>Neurocrit Care</i> . 2017 Jun;26(3):436-443. doi: 10.1007/s12028-016-0372-5. PMID: 28054288.                                                                                                                                                            | Not TBI                                  |
| Verhaeghe ST, van Zuuren FJ, Defloor T, Duijnste MS, Grypdonck MH. How does information influence hope in family members of traumatic coma patients in intensive care unit? <i>J Clin Nurs</i> . 2007 Aug;16(8):1488-97. doi: 10.1111/j.1365-2702.2006.01807.x. PMID: 17655537.                                                                                                      | Not TBI                                  |
| Verhaeghe ST, van Zuuren FJ, Defloor T, Duijnste MS, Grypdonck MH. The process and the meaning of hope for family members of traumatic coma patients in intensive care. <i>Qual Health Res</i> . 2007 Jul;17(6):730-43. doi: 10.1177/1049732307303242. PMID: 17582017.                                                                                                               | Not TBI                                  |
| Voumard RR, Dugger KM, Kiker WA, Barber J, Borasio GD, Curtis JR, Jox RJ, Creutzfeldt CJ. Goal-Concordant Care After Severe Acute Brain Injury. <i>Front Neurol</i> . 2021 Sep 17;12:710783. doi: 10.3389/fneur.2021.710783. PMID: 34603183; PMCID: PMC8485029.                                                                                                                      | No family experience                     |
| Voumard R.R., Kiker W., Dugger K., et al A new normal after severe acute brain injury: An observational cohort using a sequential explanatory design. <i>Ann. Neurol</i> . 2020;88(SUPPL 25):S206. doi:10.1002/ana.25865                                                                                                                                                             | No family experience                     |
| Vranceanu AM, Bannon S, Mace R, et al. Feasibility and Efficacy of a Resiliency Intervention for the Prevention of Chronic Emotional Distress Among Survivor-Caregiver Dyads Admitted to the Neuroscience Intensive Care Unit: A Randomized Clinical Trial. <i>JAMA netw. open</i> . 2020;3(10):e2020807. doi:10.1001/jamanetworkopen.2020.20807, 10.1001/jamanetworkopen.2020.20807 | Unable to separate severe TBI in results |
| Warren, A. M., Rainey, E. E., Weddle, R. J., Bennett, M., Roden-Foreman, K., Foreman, M. L. (2016). The intensive care unit experience: Psychological impact on family members of patients with and without traumatic brain injury. <i>Rehabil Psychol</i> . 61(2):179-85.                                                                                                           | Unable to separate severe TBI in results |
| Yeager S, Doust C, Epting S, Iannantuono B, Indian C, Lenhart B, Manche D, Morris M, Newton B, Ortman L, Young K, Thomas K. Embrace Hope: an end-of-life intervention to                                                                                                                                                                                                             | End of life only                         |

|                                                                                                                                                          |  |
|----------------------------------------------------------------------------------------------------------------------------------------------------------|--|
| support neurological critical care patients and their families. Crit Care Nurse. 2010 Feb;30(1):47-58; quiz 59. doi: 10.4037/ccn2010235. PMID: 20124020. |  |
|----------------------------------------------------------------------------------------------------------------------------------------------------------|--|
