# Supplementary material for: Exploring the Experiences of Family Members When a Patient Is Admitted to the ICU with a Severe Traumatic Brain Injury: A Scoping Review
Source: J Clin Med. 2023 Jun 21;12(13):4197. doi: 10.3390/jcm12134197 (PMC10342526; doi:10.3390/jcm12134197)
Supplement: Supplementary file 1 [file jcm-12-04197-s001.zip]

Archive with 4 entries (4 files):
- Supplementary material 1 - PRISMA ScR checklist.pdf
- Supplementary material 2 - search strategy.pdf
- Supplementary material 3 - excluded articles.pdf
- Supplementary material 4 - Appraisal.pdf
